# Supplementary material for: Detection of mephedrone and its metabolites in fingerprints from a controlled human administration study by liquid chromatography-tandem mass spectrometry and paper spray-mass spectrometry
Source: Royal Society of Chemistry journal article supplement (doi:10.1039/c9an02477h), 2020-01-01
Supplement: c9an02477h1.pdf [file c9an02477h1.pdf]

# Detection of mephedrone and its metabolites in fingerprints from a controlled human administration study by liquid chromatography-tandem mass spectrometry and paper spray-mass spectrometry

Joanna Czerwinska <sup>a</sup>, Min Jang <sup>b</sup>, Catia Costa <sup>c</sup>, Mark C. Parkin <sup>a,d</sup>, Claire George <sup>e</sup>, Andrew T. Kicman <sup>a</sup>, Melanie J. Bailey <sup>b,c,\*</sup>, Paul I. Dargan <sup>f,g</sup>, Vincenzo Abbate <sup>a,\*</sup>

<sup>a</sup> King's Forensics, Department of Analytical, Environmental and Forensic Sciences, King's College London, London, UK

<sup>b</sup> Department of Chemistry, University of Surrey, Surrey, UK

<sup>c</sup> Surrey Ion Beam Centre, University of Surrey, Surrey, UK

<sup>d</sup> Now at Eurofins Forensic Services, Teddington, UK

<sup>e</sup> Alere Toxicology (now part of Abbott), Abingdon, UK

<sup>f</sup> Clinical Toxicology, Guy's and St Thomas' NHS Foundation Trust and King's Health Partners, London, UK

<sup>g</sup> Clinical Toxicology, Faculty of Life Sciences and Medicine, King's College London, London, UK

\* Corresponding authors:

Dr Vincenzo Abbate, King's Forensics, Department of Analytical, Environmental and Forensic Sciences, King's College London, 150 Stamford Street, London SE1 9NH, UK, [vincenzo.abbate@kcl.ac.uk](mailto:vincenzo.abbate@kcl.ac.uk)

Dr Melanie J. Bailey, Department of Chemistry, University of Surrey, Surrey, UK, [m.bailey@surrey.ac.uk](mailto:m.bailey@surrey.ac.uk)

**Keywords:** mephedrone; metabolites; fingerprints; LC-MS/MS; paper spray

## **Supplementary Information**

### **1. Validation results: LC-MS/MS**

#### **2.1 Selectivity**

No interferences were observed in the extracted blank matrix.

#### **2.2 Linearity**

Mean linearity of  $r^2 > 0.996$  was achieved for all analytes in all three validation runs.

#### **2.3 LOD and LLOQ**

Presented in the paper.

#### **2.4 Precision and accuracy**

Intra-day and inter-day precision and accuracy results, summarised in Table S1, were found to be within the acceptable limits. The intra-day inaccuracy was within  $\pm 15\%$  of the target concentration and ranged from 96.6-115% for MEPH, 101-105% for DHM, 90.9-106% for NOR, 85.6-111% for HYDROXY, 85.5-108% for 4-CARBOXY and 88.3-107% for DHNM. The intra-day imprecision was  $< 13.8\%$  and ranged from 0.523-5.10% for MEPH, 1.58-4.48% for DHM, 2.048-9.95% for NOR, 2.64-9.09% for HYDROXY, 2.51-13.8% for 4-CARBOXY and 0.906-5.06% for DHNM. Inter-day precision and accuracy results were acceptable over the validated range with  $\% CV < 14.5\%$  and accuracy within  $\pm 7.50\%$  of the target concentration.

Table S1. Precision and accuracy at QC Low, QC Medium and QC High; \* average value of 18 measurements over 3 days

| Analyte   | True value<br>(ng/fingerprint) | Mean (ng/fingerprint), (% CV), % accuracy |             |             |                     |
|-----------|--------------------------------|-------------------------------------------|-------------|-------------|---------------------|
|           |                                | Day 1 (n=6)                               | Day 2 (n=6) | Day 3 (n=6) | Inter-day<br>(n=3)* |
| MEPH      | 0.08                           | 0.080                                     | 0.085       | 0.081       | 0.082               |
|           |                                | 1.31%                                     | 3.44%       | 5.10%       | 4.58%               |
|           |                                | 100%                                      | 107%        | 101%        | 102%                |
|           | 1                              | 1.04                                      | 1.05        | 0.992       | 1.02                |
|           |                                | 2.76%                                     | 3.89%       | 2.28%       | 3.78%               |
|           |                                | 104%                                      | 105%        | 99.2%       | 102%                |
|           | 4                              | 4.06                                      | 4.58        | 3.86        | 4.25                |
|           |                                | 0.523%                                    | 1.06%       | 3.11%       | 9.61%               |
|           |                                | 101%                                      | 115%        | 96.6%       | 106%                |
| DHM       | 0.04                           | 0.041                                     | 0.042       | 0.041       | 0.042               |
|           |                                | 3.07%                                     | 2.62%       | 2.23%       | 2.63%               |
|           |                                | 103%                                      | 104%        | 103%        | 103%                |
|           | 0.5                            | 0.503                                     | 0.510       | 0.505       | 0.506               |
|           |                                | 1.79%                                     | 2.20%       | 2.43%       | 2.10%               |
|           |                                | 101%                                      | 102%        | 101%        | 101%                |
|           | 4                              | 4.10                                      | 4.10        | 4.19        | 4.19                |
|           |                                | 4.48%                                     | 1.58%       | 3.41%       | 7.37%               |
|           |                                | 103%                                      | 102%        | 105%        | 105%                |
| NOR       | 0.08                           | 0.077                                     | 0.081       | 0.075       | 0.078               |
|           |                                | 5.12%                                     | 3.68%       | 8.95%       | 6.66%               |
|           |                                | 96.7%                                     | 101%        | 93.1%       | 96.8%               |
|           | 1                              | 0.913                                     | 0.951       | 0.909       | 0.925               |
|           |                                | 4.71%                                     | 5.28%       | 2.87%       | 4.74%               |
|           |                                | 91.3%                                     | 95.1%       | 90.9%       | 92.5%               |
|           | 4                              | 3.66                                      | 3.87        | 4.26        | 4.03                |
|           |                                | 2.04%                                     | 2.66%       | 5.25%       | 14.5%               |
|           |                                | 91.6%                                     | 96.6%       | 106%        | 101%                |
| HYDROXY   | 0.05                           | 0.049                                     | 0.052       | 0.049       | 0.050               |
|           |                                | 5.91%                                     | 2.64%       | 5.53%       | 3.21%               |
|           |                                | 98.1%                                     | 104%        | 98.2%       | 100%                |
|           | 1                              | 1.01                                      | 0.892       | 1.11        | 1.00                |
|           |                                | 3.14%                                     | 8.43%       | 4.15%       | 10.7%               |
|           |                                | 101%                                      | 89.2%       | 111%        | 100%                |
|           | 4                              | 4.16                                      | 4.29        | 3.42        | 3.96                |
|           |                                | 8.28%                                     | 3.64%       | 9.09%       | 11.8%               |
|           |                                | 104%                                      | 107%        | 85.6%       | 98.9%               |
| 4-CARBOXY | 0.05                           | 0.045                                     | 0.050       | 0.048       | 0.048               |
|           |                                | 10.7%                                     | 5.41%       | 6.91%       | 5.49%               |
|           |                                | 90.1%                                     | 101%        | 95.2%       | 95.3%               |
|           | 1                              | 0.958                                     | 0.863       | 10.6        | 0.960               |

|             |      |       |        |       |        |
|-------------|------|-------|--------|-------|--------|
| <b>DHNM</b> | 4    | 2.51% | 8.05%  | 2.91% | 10.1%  |
|             |      | 95.8% | 86.3%  | 106%  | 96.0%  |
|             |      | 3.98  | 4.31   | 3.42  | 3.90   |
|             |      | 13.4% | 7.58%  | 13.8% | 11.5%  |
|             | 0.08 | 99.4% | 108%   | 85.5% | 97.6%  |
|             |      | 0.074 | 0.083  | 0.080 | 0.079  |
|             |      | 5.06% | 1.99%  | 4.96% | 1.12%  |
|             |      | 92.7% | 104%   | 99.6% | 98.7%  |
|             | 1    | 0.883 | 1.01   | 0.980 | 0.957  |
|             |      | 3.67% | 2.47%  | 1.83% | 0.484% |
|             |      | 88.3% | 101%   | 98.0% | 95.7%  |
|             |      | 3.83  | 4.27   | 4.23  | 4.17   |
|             | 4    | 3.62% | 0.906% | 2.53% | 1.44%  |
|             |      | 95.8% | 107%   | 106%  | 104%   |

## 2.5 Recovery and matrix effect

As shown in Table S2, recovery was found to be greater than  $60.6 \pm 6.16\%$  for all analytes, with NOR showing the lowest recovery of  $60.6 \pm 6.16\%$  and  $63.5 \pm 4.32\%$  at QC Low and QC High, respectively. The highest recovery of  $91.3 \pm 5.53\%$  and  $91.1 \pm 7.57\%$  was achieved for DHM at QC Low and QC High, respectively. The IS-corrected matrix effect values were within  $\pm 7.3\%$  for all analytes, showing that significant matrix effects do not affect the assay.

Table S2. Analyte recovery and matrix effect at QC Low and QC High

| Analyte          | Recovery (% CV), n=6 |               | Matrix Effect (% CV), n=6 |                |
|------------------|----------------------|---------------|---------------------------|----------------|
|                  | QC LOW               | QC HIGH       | QC LOW                    | QC HIGH        |
| <b>MEPH</b>      | 72.2% (4.27%)        | 61.9% (5.67%) | 101% (1.02%)              | 96.6% (1.77%)  |
| <b>DHM</b>       | 91.3% (5.53%)        | 91.1% (7.57%) | 101% (1.34%)              | 99.1% (0.375%) |
| <b>NOR</b>       | 60.6% (6.16%)        | 63.5% (4.32%) | 99.8% (2.99%)             | 92.7% (1.43%)  |
| <b>HYDROXY</b>   | 82.5% (5.60%)        | 62.7% (4.32%) | 97.9% (5.02%)             | 96.1% (6.63%)  |
| <b>4-CARBOXY</b> | 83.4% (5.33%)        | 75.2% (4.24%) | 98.6% (8.44%)             | 99.4% (6.24%)  |
| <b>DHNM</b>      | 84.9% (8.11%)        | 70.6% (5.30%) | 102% (3.63%)              | 93.6% (2.39%)  |

## **2.6 Carryover**

Carryover was not observed.

## **2.7 Dilution integrity**

Good precision (9.91%) and accuracy (92.9%) were achieved for mephedrone following 1 in 100 dilution.

# **2. Validation results: PS-MS**

## **2.1 Selectivity**

Due to the lack of sample preparation and chromatography prior to the ionisation step, isobaric interferences (peak intensity of around  $10^3$ - $10^5$ ) for all analytes were present in all tested solvents.

## **2.2 Linearity**

Mean linearity of  $r^2 > 0.990$  was achieved for MEPH and DHM in all three validation runs (Figure S1).

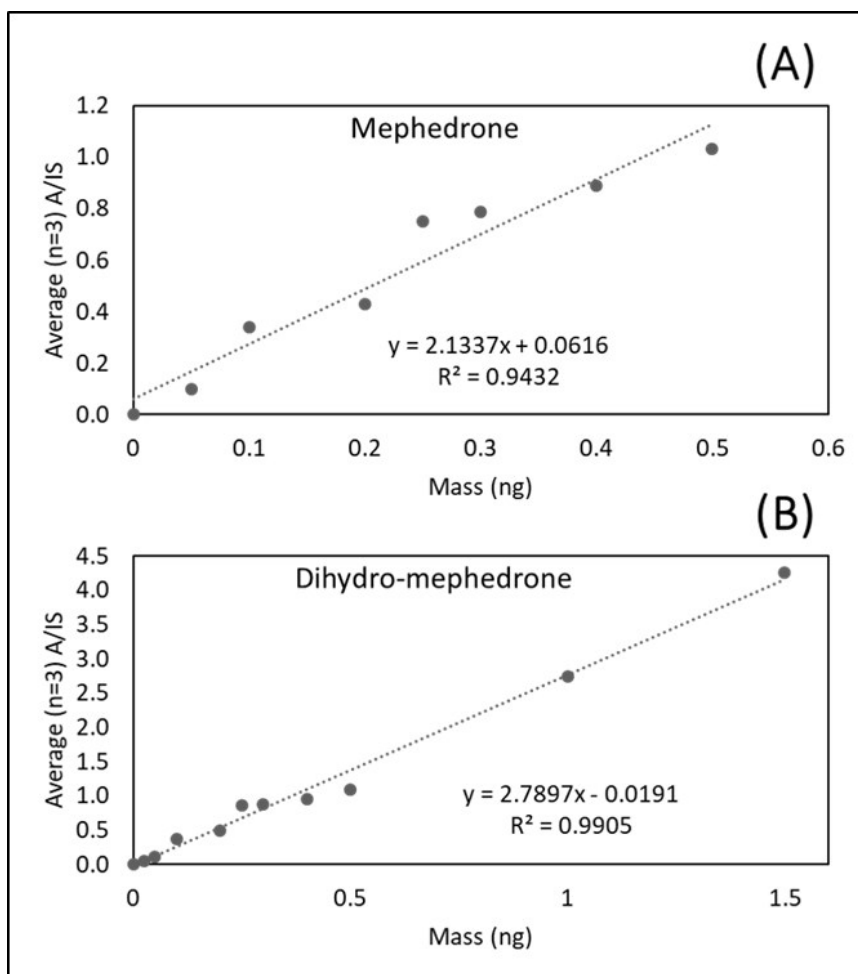

Figure S1. Calibration curves and the corresponding errors expressed as %CV for MEPH (A) and DHM (B); data expressed as ratio of analyte to internal standard (A/IS)

### 2.3 LOD and LLOQ

Presented in the paper.

### 2.4 Precision and accuracy

Intra-day and inter-day precision and accuracy results, summarised in Table S3 and Table S4, were found to be within the acceptable limits. Intra and intra-day imprecision and accuracy were within  $\pm 20\%$  of the target value for both analytes.

Table S3. Inter- and intra-day precision for MEPH and DHM measured using paper spray; \* average value of 9 measurements over 3 days

| Analyte | pg/fingerprint | Mean (Analyte/IS ratio), (%CV) |             |             |                  |
|---------|----------------|--------------------------------|-------------|-------------|------------------|
|         |                | Day 1 (n=3)                    | Day 2 (n=3) | Day 3 (n=3) | Inter-day (n=3)* |
| MEPH    | 500            | 0.74                           | 0.67        | 0.65        | 0.69             |
|         |                | 6%                             | 2%          | 7%          | 7%               |
|         | 1500           | 3.3                            | 2.74        | 2.73        | 2.92             |
|         |                | 2%                             | 2%          | 7%          | 11%              |
| DHM     | 500            | 0.76                           | 0.85        | 0.68        | 0.76             |
|         |                | 16%                            | 1%          | 4%          | 11%              |
|         | 1500           | 4.57                           | 4.33        | 3.43        | 4.11             |
|         |                | 2%                             | 4%          | 8%          | 15%              |

Table S4. Intra-day accuracy and %CV of the paper spray method at QC Low and QC High (n=3)

|      | pg/fingerprint | Calculated mass of QC (ng) | %CV | Accuracy |
|------|----------------|----------------------------|-----|----------|
| MEPH | 500            | 0.48                       | 7%  | 96%      |
|      | 1500           | 2.44                       | 1%  | 97%      |
| DHM  | 500            | 0.46                       | 7%  | 91%      |
|      | 1500           | 2.55                       | 3%  | 102%     |

## 2.5 Matrix effects

Fingerprint samples were collected from the right thumb (RT) and right index (RI) and as 5 overlapping fingerprint samples (5F). As shown in Table S5, significant matrix effects were not observed for MEPH or DHM.

Table S5. Matrix effects for MEPH and DHM in the present of a single (right thumb, RT and right index, RI) or 5 overlapping fingerprints (5F) for a male and female donors

|         | Matrix effect, (%CV) |         |          |          |          |         |
|---------|----------------------|---------|----------|----------|----------|---------|
|         | Male                 |         |          | Female   |          |         |
| Analyte | RT                   | RI      | 5F       | RT       | RI       | 5F      |
| MEPH    | -7 (11%)             | -7 (7%) | -10 (6%) | -11 (7%) | -13 (7%) | -8 (5%) |
| DHM     | -3 (6%)              | -2 (3%) | -2 (7%)  | -6 (11%) | -4 (7%)  | -5 (4%) |

## 2.6 Carryover

No carryover effect was observed.

## 2.7 Stability

Table S6. Week 1 and week 4 stability of MEPH and DHM prepared at 50 ng/mL in solution (Sol) and fingerprints (RT and RI) and stored at different temperatures (n=3); data is represented as +/-% change (%CV)

| 1 week @ +5°C   |                  |                  |            |
|-----------------|------------------|------------------|------------|
|                 | Fingerprint (RT) | Fingerprint (RI) | Solution   |
| MEPH            | -18% (12%)       | -17% (15%)       | -6% (18%)  |
| DHM             | -40% (15%)       | -36% (15%)       | -1% (5%)   |
| 4 weeks @ +5°C  |                  |                  |            |
|                 | Fingerprint (RT) | Fingerprint (RI) | Solution   |
| MEPH            | -37% (39%)       | -36% (15%)       | 6% (6%)    |
| DHM             | -56% (40%)       | -53% (22%)       | -27% (16%) |
| 1 week @ -20°C  |                  |                  |            |
|                 | Fingerprint (RT) | Fingerprint (RI) | Solution   |
| MEPH            | -24% (12%)       | -23% (17%)       | 1% (12%)   |
| DHM             | -41% (16%)       | -41% (16%)       | 16% (19%)  |
| 4 weeks @ -20°C |                  |                  |            |
|                 | Fingerprint (RT) | Fingerprint (RI) | Solution   |
| MEPH            | -41% (33%)       | -38% (27%)       | 12% (8%)   |
| DHM             | -63% (44%)       | -67% (63%)       | -21% (11%) |



### 3. PS-MS parameters

Table S7 shows the MS parameters used for the PS-MS method.

*Table S7. MS parameters used for the PS-MS method (Thermo Scientific Q-Exactive Plus Orbitrap)*

| Parameter                      | Operating Conditions         |
|--------------------------------|------------------------------|
| Electrospray source parameters |                              |
| Spray voltage                  | 4 kV                         |
| Capillary temperature          | 250°C                        |
| S-Lens RF level                | 50                           |
| Full Scan                      |                              |
| Scan type                      | Full MS-SIM                  |
| Scan range                     | $m/z$ 66.7-500               |
| Resolution                     | 280,000 at $m/z$ 200         |
| Polarity                       | Positive                     |
| Automatic gain control target  | $10^6$                       |
| Maximum inject time            | 500 ms                       |
| MS/MS                          |                              |
| Scan type                      | Parallel Reaction Monitoring |
| Resolution                     | 17,500                       |
| Automatic gain control         | 200,000                      |
| Max inject time                | 30 ms                        |
| Isolation window               | $m/z$ 0.5                    |
| Normalised collision energy    | Stepped: 30, 60, 90          |

### 4. PS-MS spectra

Figure S2 and Figure S3 show the MS and MS/MS spectra of all analytes, respectively.

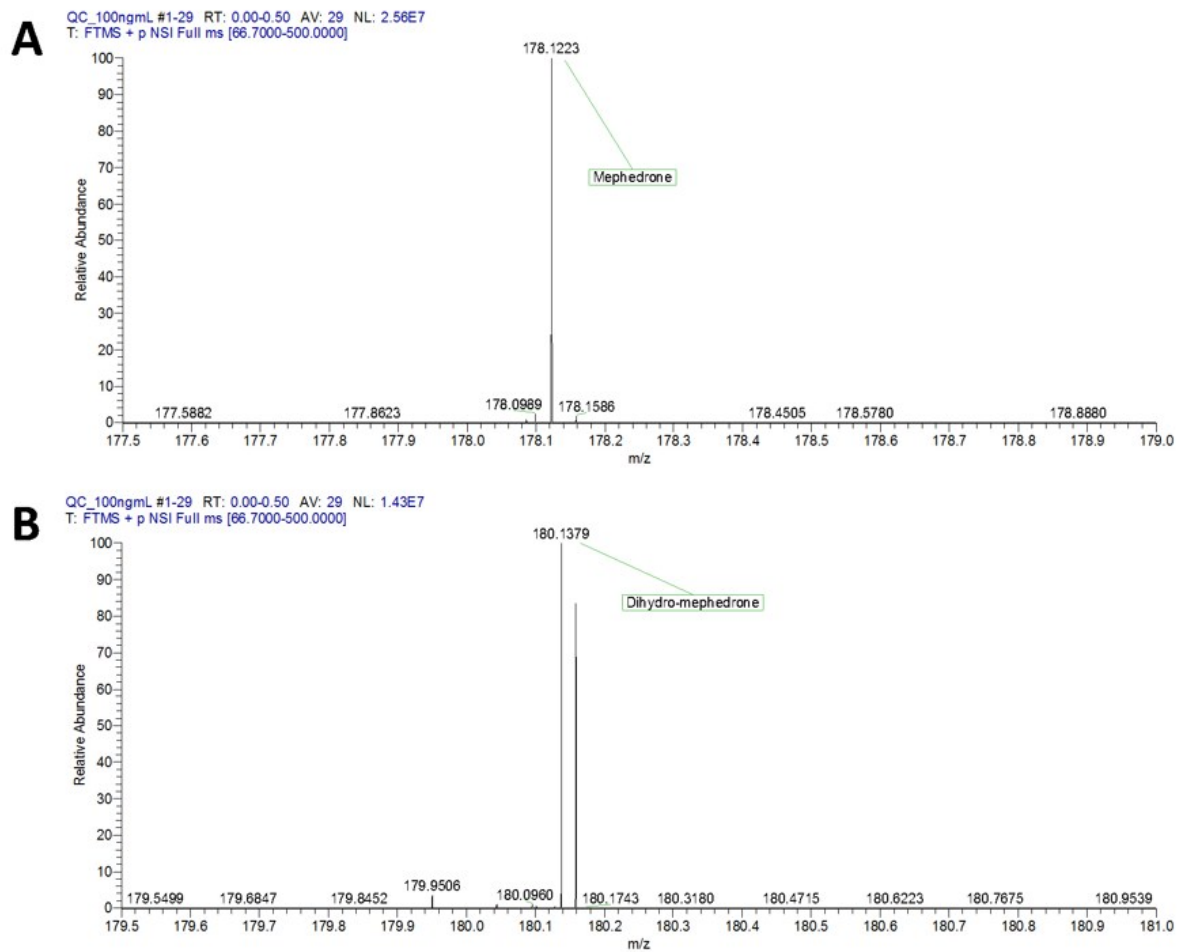

Figure S2. Example mass spectra for (A) MEPH and (B) DHM

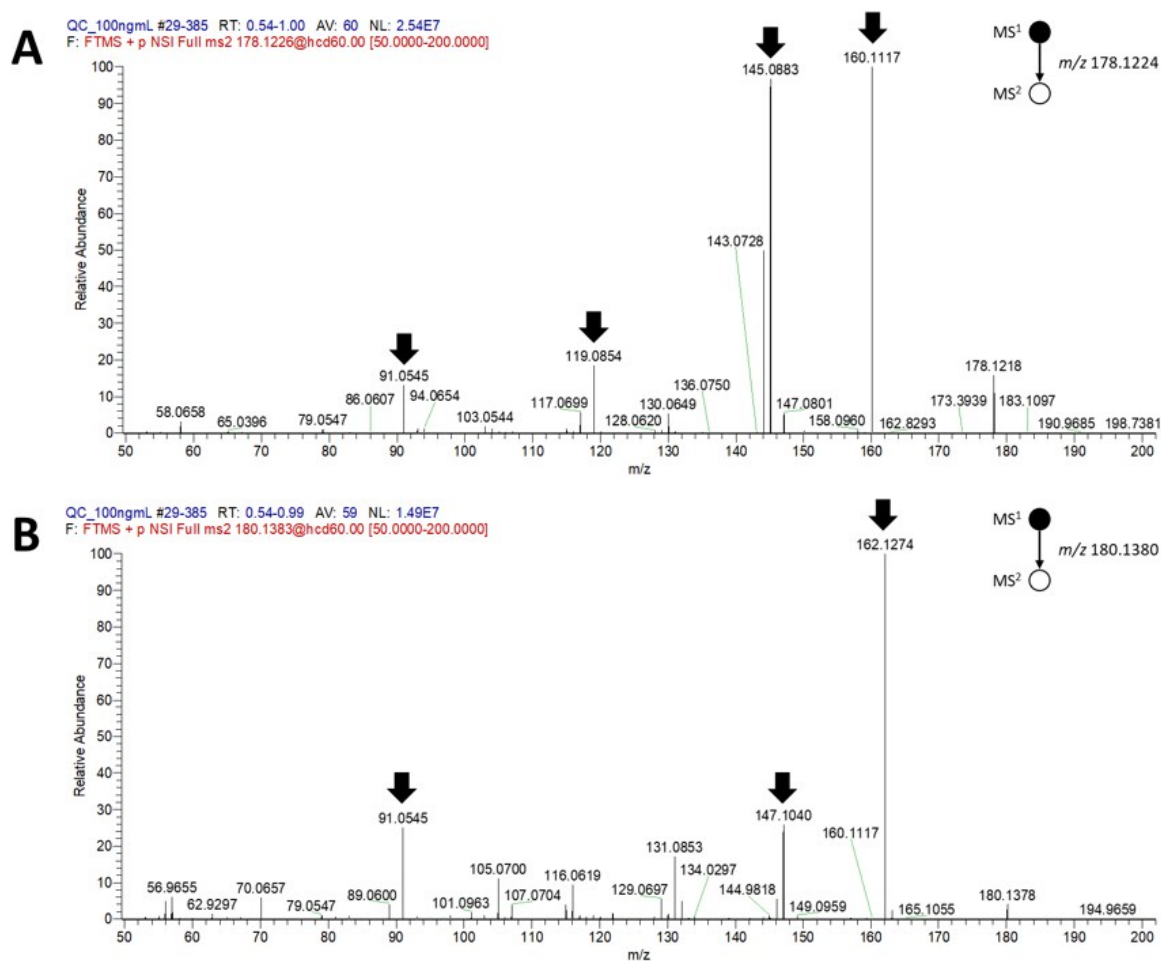

Figure S3. Example MS/MS spectra for (A) MEPH ( $m/z$  178.1 > 160.11) and (B) DHM ( $m/z$  180.1 > 162.13) from a standard (250 pg/fingerprint). Peak assignment was confirmed by agreement with the standard to within 5 ppm.

## 5. Urine screen

The urine samples were analysed using a standard stimulant (including mephedrone) immunoassay screen at Abbott. The immunoassay was run on a Beckman Coulter 5800 and reagents were purchased from ThermoFisher (see Table S8 for further details). Any positive samples were confirmed by a validated LC-MS method using an Orbitrap MS system.

Table S8. Analytes and their corresponding cut-off values

| Analyte         | Cut-off    |
|-----------------|------------|
| Amphetamines    | 1000 ng/mL |
| Barbiturates    | 200 ng/mL  |
| Benzodiazepines | 200 ng/mL  |
| Cannabis        | 50 ng/mL   |
| Cocaine         | 300 ng/mL  |
| Methadone       | 300 ng/mL  |
| Opiates         | 300 ng/mL  |
| Buprenorphine   | 10 ng/mL   |
| Ketamine        | 500 ng/mL  |
| Tramadol        | 200 ng/mL  |
| Propoxyphene    | 300 ng/mL  |
| PCP             | 25 ng/mL   |
| Methaqualone    | 300 ng/mL  |
| 6AM             | 10 ng/mL   |
| LSD             | 0.5 ng/mL  |

**LC-MS details:**

**Mass Spectrometer:** Thermo Exactive Orbitrap HCD System with Ion Max Source and H-ESI II Probe

**Pump:** Accela UHPLC

**Autosampler:** Accela

**Column:** Hypersil GOLD 5-x3.1 1.9uM Column, C18
